# Supplementary material for: Dexamethasone‐Sparing Regimens with Oral Netupitant and Palonosetron for the Prevention of Emesis Caused by High‐Dose Cisplatin: A Randomized Noninferiority Study
Source: PubMed Central journal article supplement — Oncologist. 2021 Jun 18;26(10):e1854–61. doi: 10.1002/onco.13851 (PMC8488764; doi:10.1002/onco.13851), 2021-06-18
Supplement: ONCO-26-e1854-s001.pdf [file ONCO-26-e1854-s001.pdf]

Supplemental Table for:  
 Dexamethasone-sparing regimens with oral NEPA for the prevention of emesis caused by high-dose cisplatin: A randomized non-inferiority study  
 Luigi Celio et al.

**Supplementary Table S1** Most common treatment-related adverse events

| <b>Adverse event</b> | <b>NEPA + DEX1</b> | <b>NEPA + DEX3</b> | <b>NEPA + DEX4</b> |
|----------------------|--------------------|--------------------|--------------------|
|                      | <b>(N = 84)</b>    | <b>(N = 85)</b>    | <b>(N = 83)</b>    |
|                      | <b>N (%)</b>       | <b>N (%)</b>       | <b>N (%)</b>       |
| Anorexia             | 0                  | 0                  | 1 (1.2)            |
| Constipation         | 4 (4.8)            | 2 (2.4)            | 4 (4.8)            |
| Fatigue              | 1 (1.2)            | 5 (5.9)            | 3 (3.6)            |
| Gastritis            | 1 (1.2)            | 2 (2.4)            | 3 (3.6)            |
| Diarrhea             | 0                  | 1 (1.2)            | 2 (2.4)            |
| Hiccups              | 0                  | 1 (1.2)            | 2 (2.4)            |
| Insomnia             | 0                  | 0                  | 1 (1.2)            |

Abbreviations: DEX1, dexamethasone day 1; DEX3, dexamethasone day 1 to 3; DEX4, dexamethasone day 1 to 4.
